# Supplementary material for: Thermal and Medium Stability Study of Polyvidone-Modified Graphene Oxide-Coated Gold Nanorods with High Photothermal Efficiency
Source: MDPI journal article supplement (doi:10.3390/nano12193382), 2022-09-27
Supplement: s1 [file s1]

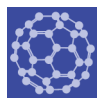

## Article

# Thermal and Medium Stability Study of Polyvidone-Modified Graphene Oxide-Coated Gold Nanorods with High Photothermal Efficiency

Thabang Calvin Lebepe <sup>1,2</sup> and Oluwatobi Samuel Oluwafemi <sup>1,2,\*</sup>

<sup>1</sup> Department of Chemical Science, University of Johannesburg, Johannesburg 2028, South Africa

<sup>2</sup> Centre for Nanomaterials Sciences Research, University of Johannesburg, Johannesburg 2028, South Africa

\* Correspondence: oluwafemi.oluwatobi@gmail.com

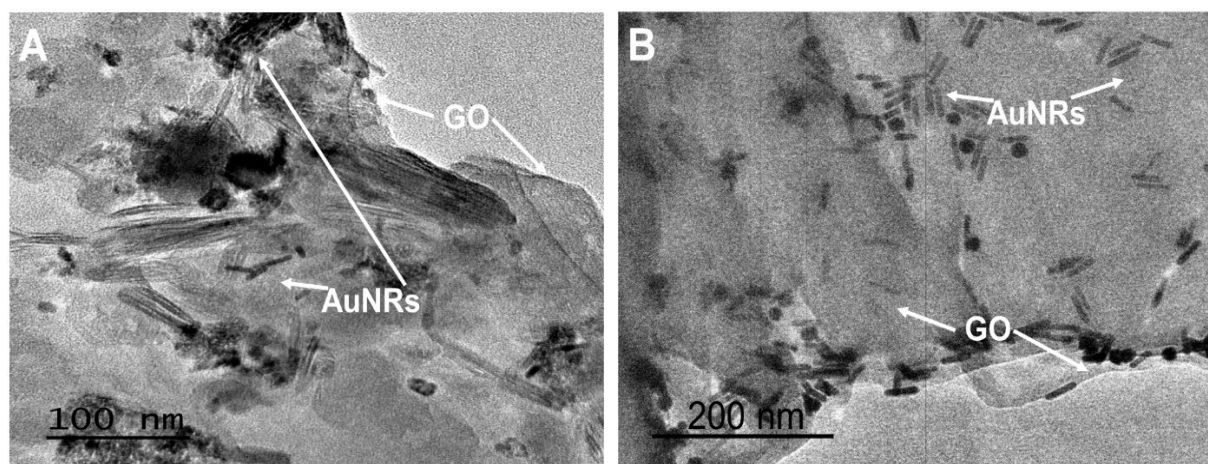

**Figure S1.** TEM images of GO@AuNRs and mGO@AuNRs

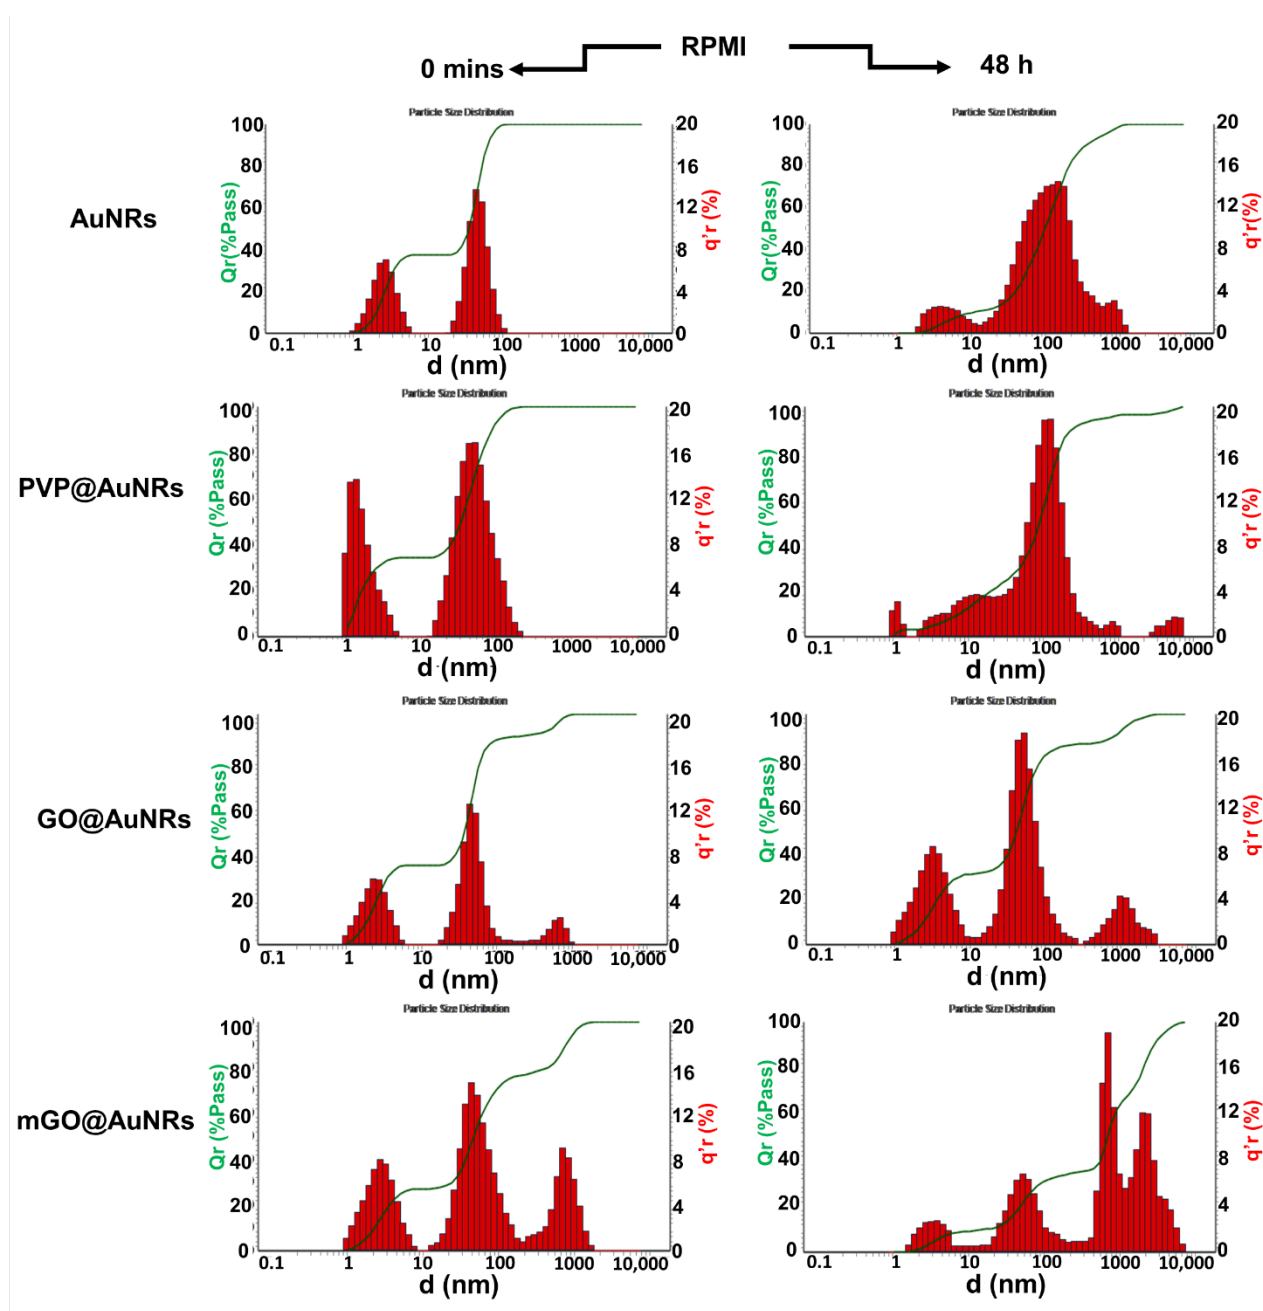

Figure S2. DLS of AuNRs, PVP @AuNRs, GO@AuNRs and mGO@AuNRs, in PBS at 0 min and 48 h.

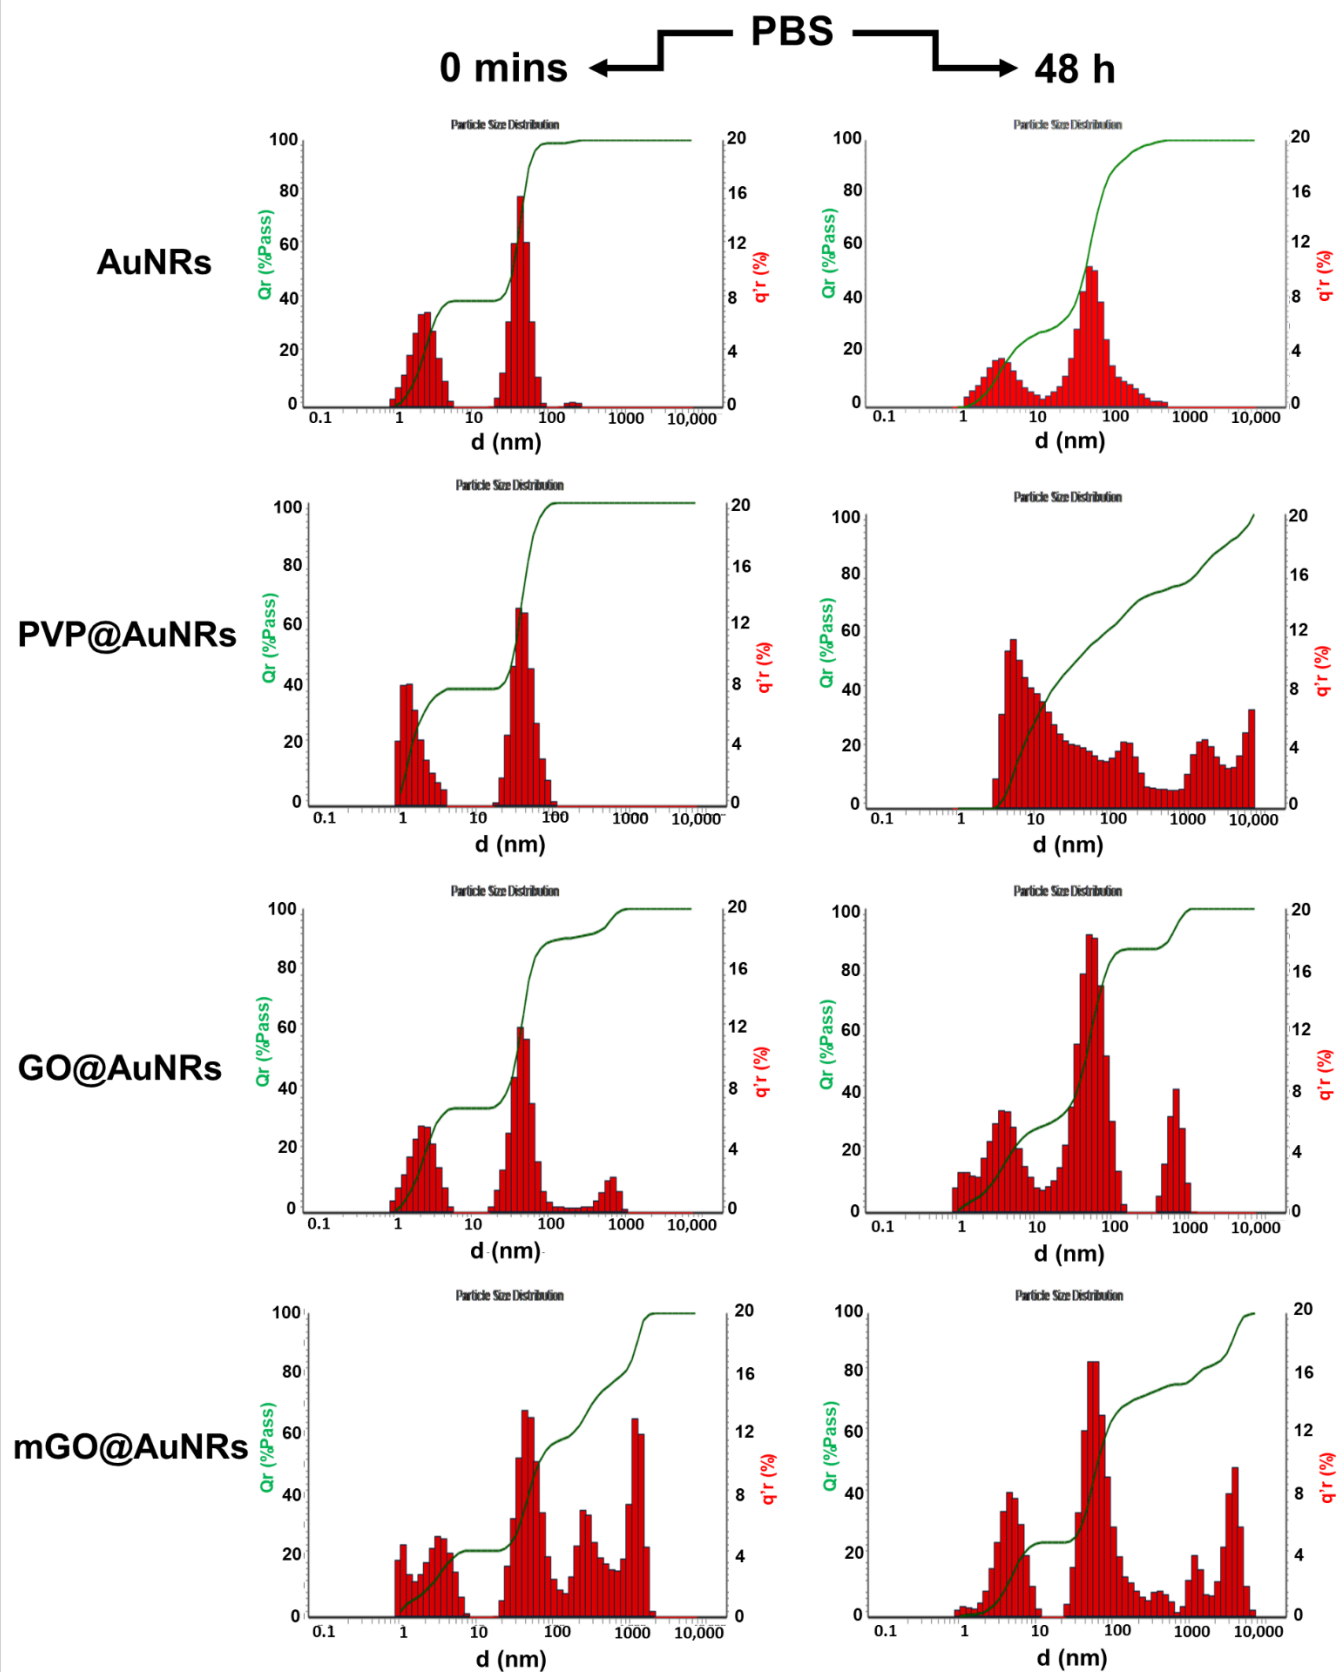

Figure S3. DLS of AuNRs, PVP @AuNRs, GO@AuNRs and mGO@AuNRs, in PBS at 0 min and 48 h.

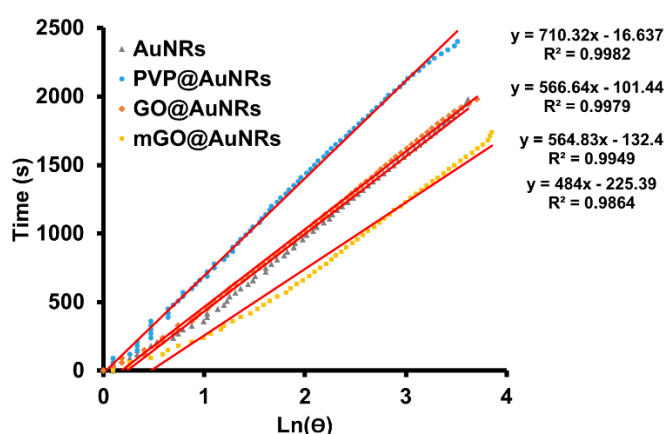

**Figure S4.** The time constant for heat transfer of AuNRs, PVP @AuNRs, GO@AuNRs, and mGO@AuNRs by applying the natural logarithm of temperature change versus time data acquired from the cooling.

**Table S.1.** Power density and photothermal conversion efficiency (%) of different nanocomposites irradiated with 808 nm laser.

| Nanocomposites                 | Laser wavelength (nm) and power density | Photothermal conversion efficiency (%) | Ref |
|--------------------------------|-----------------------------------------|----------------------------------------|-----|
| Apt@GO@Au-His@a-ZnO            | 1.5 W.cm <sup>-2</sup>                  | 38.0                                   | [1] |
| mPEG-PEI-AuNRs                 | 0.8 W cm <sup>-2</sup>                  | 27.7                                   | [2] |
| MoTe <sub>2</sub> nanosheets   | 0.6 W cm <sup>-2</sup>                  | 33.8                                   | [3] |
| AuNRs/GO@PDA hybrid nanosheets | 2 W cm <sup>-2</sup>                    | 36.1                                   | [4] |
| PEG-AuNRs                      | 1.5 W cm <sup>-2</sup>                  | 52                                     | [5] |
| <b>This work</b>               | 1.27 W.cm <sup>-2</sup>                 |                                        | -   |
| PVP@AuNRs                      |                                         | 21.5 %                                 |     |
| GO@AuNRs                       |                                         | 37.8 %                                 |     |
| mGO@AuNRs                      |                                         | 54.8%                                  |     |

## References

1. Zhang, M.; Wu, F.; Wang, W.; Shen, J.; Zhou, N.; Wu, C. Multifunctional Nanocomposites for Targeted, Photothermal, and Chemotherapy. *Chem. Mater.* **2019**, *31*, 1847–1859. <https://doi.org/10.1021/acs.chemmater.8b00934>.
2. Xu, C.; Wang, Y.; Wang, E.; Yan, N.; Sheng, S.; Chen, J.; Lin, L.; Guo, Z.; Tian, H.; Chen, X. Effective Eradication of Tumors by Enhancing Photoacoustic-Imaging-Guided Combined Photothermal Therapy and Ultrasonic Therapy. *Adv. Funct. Mater.* **2021**, *31*, 2009314. <https://doi.org/10.1002/adfm.202009314>.
3. Ma, N.; Zhang, M.-K.; Wang, X.-S.; Zhang, L.; Feng, J.; Zhang, X.-Z. NIR Light-Triggered Degradable MoTe<sub>2</sub> Nanosheets for Combined Photothermal and Chemotherapy of Cancer. *Adv. Funct. Mater.* **2018**, *28*, 1801139. <https://doi.org/10.1002/adfm.201801139>.
4. Qi, Z.; Shi, J.; Zhu, B.; Li, J.; Cao, S. Gold nanorods/graphene oxide nanosheets immobilized by polydopamine for efficient remotely triggered drug delivery. *Journal of Materials Science* **2020**, *55*, 14530–14543. <https://doi.org/10.1007/s10853-020-05050-2>.
5. Sun, M.; Liu, F.; Zhu, Y.; Wang, W.; Hu, J.; Liu, J.; Dai, Z.; Wang, K.; Wei, Y.; Bai, J. Salt-induced aggregation of gold nanoparticles for photoacoustic imaging and photothermal therapy of cancer. *Nanoscale* **2016**, *8*, 4452–4457.
